# Supplementary material
Source: HighWire-hosted journal article supplement (doi:10.1101/rna.079135.122)
Supplement: Supplemental_Legends.docx [file Supplemental_Legends.docx]

**Supplemental figure S1**

Color profile plots for the images shown in Figure 2A (A), Figure 2B (B), Figure 2C (C), and Figure 6C, D, G, H (D). Yellow lines indicate the region analyzed in the intensity profile plots. X axis represents the number of pixels and Y axis represents arbitrary unit for the intensity of the signals of each channel. Scale bars, 10 µm in A, B, and D, and 0.5 µm in C.

**Supplemental figure S2**

Color profile plots for the images shown in Figure 4. Yellow lines indicate the region analyzed in the intensity profile plots. X axis represents the number of pixels and Y axis represents arbitrary unit for the intensity of the signals of each channel. Scale bar, 10 µm.

**Supplemental figure S3**

Color profile plots for the images shown in Figure 5. Yellow lines indicate the region analyzed in the intensity profile plots. X axis represents the number of pixels and Y axis represents arbitrary unit for the intensity of the signals of each channel. Scale bar, 10 µm.

**Supplemental figure S4**

(A) Prion like domains of FET family proteins, predicted by PLAAC (Lancaster et al. 2014). (B) Amino acid sequence alignment of FET family proteins in human (h), mouse (h), and naked mole-rat (n).

**Supplemental table S5**

List of antibodies used in this study, and list of primers used to for vector constructions and RT-qPCR analyses.
