# Supplementary material
Source: HighWire-hosted journal article supplement (doi:10.1101/rna.079135.122)
Supplement: Supplemental_Table_S1.xlsx [file Supplemental_Table_S1.xlsx]

## Sheet: Sheet1
Supplemental table S1
Primers used to prepare PCR fragments directly used for template DNA during probe preparations
gene	Forward	Reverse
mMalat1	AGGCGGTGGTTTAAGGAAGT	ACTCCCCCAAAACCATTAGG
mNeat1_1/2	AGGAGGGCTCGCTCTTGGGG	CAGGAAACAGCTATGACAATTAACCCTCACTAAAGGGCATC
mNeat1_2 mid	TATTGGCCAATCACGAGTTTTACG	ATGACTAATACGACTCACTATAGGGTATACGTCCTGTATATGTTCTGC
mNeat1_2 3'	ATCCTCAACAATGAAGTGAGGATG	ATGACTAATACGACTCACTATAGGGAAAGCTGCCTGAGGCTCAAAGTC
Primers used to prepare PCR fragments for TA cloning
gene	Forward	Reverse
nMalat1	AGGCGGTGGTTTAAGGAAGT	ACTCCCCCAAAACCATTAGG
nNeat1_1/2	GACACGGGGACTTGATCTCC	ATCTGCAAGCGCCATCTACA
nNeat1_2 mid	CCAGCCTTTGCCCTATCTCC	GCGATTCAGAGGTGGCTACA
nNeat1_2 3'	TCTGGGAAGCTGGGGACTTA	AGGATAGAAGCAGGACGCCA
nFus	GCTACTCCCAGCAGAGCAAT	GCCACTGCCACTGTTGTACT
nEwsr1	GCCTCCCACTGGTTATACTACT	CTTGGCAGTCGGTGGATCTT
nTaf15	CGTATGGGCAGAGCTATGGG	GACGAGAGTCCTCCGGTCTA
Primers used for RT-qPCR analyses
nNeat1_1/2 5'	TGTGGTGGAATTCTGCAGATATGGATTACAAGGACGACGATGACAAGGCTTCAAACGACTATACCCA	CGGCCGCCACTGTGCTGGATCTAATATGGCCTCTCCCTGC
nNeat1_2 3'	TGTGGTGGAATTCTGCAGATATGGATTACAAGGACGACGA	CGGCCGCCACTGTGCTGGATCTAGTAGGGCCGGTCTCTGC
nMalat1	TGTGGTGGAATTCTGCAGATATGGATTACAAGGACGACGA	CGGCCGCCACTGTGCTGGATTCAGTATGGTCGGTTGCGCT
Primers used to generate lentiviral vector
	Forward	Reverse
mFus	TGTGGTGGAATTCTGCAGATATGGATTACAAGGACGACGATGACAAGGCTTCAAACGACTATACCCA	CGGCCGCCACTGTGCTGGATCTAATATGGCCTCTCCCTGC
mEwsr1	TGTGGTGGAATTCTGCAGATATGGATTACAAGGACGACGA	CGGCCGCCACTGTGCTGGATCTAGTAGGGCCGGTCTCTGC
mTaf15	TGTGGTGGAATTCTGCAGATATGGATTACAAGGACGACGA	CGGCCGCCACTGTGCTGGATTCAGTATGGTCGGTTGCGCT
Primers used for 5' RACE
nNEAT1 1st primer	GATTACGCCAAGCTTCCCTGCCTTCCACGATCACTACAACG
nNEAT1 nested primer	GATTACGCCAAGCTTTCCATCTTCCCACCTCAGCCTTTCC
nMALAT1 1st primer	GATTACGCCAAGCTTCCTGCGTCATGGTCCTCTAGCCACC
nMALAT1 1st nested primer	GATTACGCCAAGCTTCCAAGCACAAGCTTCACCTCAATC
Antisense oligonucleotide for knockdown of nNEAT1
ASO1	mC*mC*mU*mC*mC*T*G*G*A*G*A*T*C*A*A*mG*mU*mC*mC*mC
ASO2	mG*mU*mC*mC*mU*G*C*T*C*G*T*T*C*T*G*mG*mG*mA*mC*mA
Antibodies used in this study
anti-DIG, alkalike phosphatase conjudated
anti-DIG	Abcam #420
anti-Nono	Souquere et al., 2010
anti-Fus	clone 4H11, Santa Cruz
streptoavidin Cy3	Sigma #56402
anti-mouse Alexa488	Invitrogen #A11001
anti-rabbit Cy5	Thermo Fisher #A10523
anti-mouse Cy3	Merck Millipore #AP124C
anti-rabbit Cy2	Abcam #6940
anti-rabbit Alexa488	Invitrogen #A11008
